# Supplementary material for: Adolescents with a Favorable Mediterranean-Style-Based Pattern Show Higher Cognitive and Academic Achievement: A Cluster Analysis—The Cogni-Action Project
Source: MDPI journal article supplement (doi:10.3390/nu16050608), 2024-02-23
Supplement: s1 [file s1]

|                     |                   |                   |                   |                   |                  |                   |                   |                   |                   |                   |                   |                   |                 |                   |                   |                   |                   |                   |                   |                   |              |              |              |   |
|---------------------|-------------------|-------------------|-------------------|-------------------|------------------|-------------------|-------------------|-------------------|-------------------|-------------------|-------------------|-------------------|-----------------|-------------------|-------------------|-------------------|-------------------|-------------------|-------------------|-------------------|--------------|--------------|--------------|---|
| P) Skip breakfast   | -<br>0.136<br>*** | -<br>0.115<br>*** | 0.002             | -<br>0.113<br>*** | -<br>0.033       | -<br>0.091        | -<br>0.133<br>*** | -<br>0.111<br>*** | -<br>0.094<br>*** | -<br>0.104<br>*** | 0.137<br>***      | -<br>0.031        | 0.103<br>***    | -<br>0.101<br>*** | -<br>0.047        | -                 |                   |                   |                   |                   |              |              |              |   |
| Q) Dairy breakfast  | 0.005             | 0.006             | -<br>0.026        | 0.022             | 0.015            | -<br>0.009        | -<br>0.014        | -<br>0.015        | 0.028             | 0.033             | -<br>0.012        | 0.094<br>***      | 0.025           | 0.174<br>***      | 0.108<br>***      | -<br>0.160<br>*** | -                 |                   |                   |                   |              |              |              |   |
| R) Pastry breakfast | -<br>0.182<br>*** | -<br>0.075<br>**  | -<br>0.126<br>*** | -<br>0.085<br>**  | -<br>0.088<br>** | -<br>0.086<br>**  | -<br>0.071<br>*   | -<br>0.052        | -<br>0.050        | -<br>0.115<br>*** | -<br>0.270<br>*** | -<br>0.023        | 0.112<br>***    | 0.080<br>**       | 0.050             | 0.104<br>***      | 0.015             | -                 |                   |                   |              |              |              |   |
| S) Yogurt, cheese   | -<br>0.041        | -<br>0.051        | -<br>0.017        | 0.007             | -<br>0.003       | -<br>0.004        | -<br>0.029        | 0.013             | -<br>0.022        | 0.015             | 0.108<br>***      | 0.104<br>***      | 0.068<br>*      | 0.100<br>***      | 0.039             | -<br>0.004        | 0.180<br>***      | 0.095<br>***      | -                 |                   |              |              |              |   |
| T) Sweet            | -<br>0.214<br>*** | -<br>0.145<br>*** | -<br>0.095<br>*** | -<br>0.130<br>*** | -<br>0.037       | -<br>0.106<br>*** | -<br>0.128<br>*** | -<br>0.099<br>*** | -<br>0.095<br>*** | -<br>0.152<br>*** | 0.232<br>***      | -<br>0.109<br>*** | 0.133<br>***    | -<br>0.051        | -<br>0.045        | 0.213<br>***      | -<br>0.037        | 0.294<br>***      | 0.048             | -                 |              |              |              |   |
| U) Nuts             | 0.105<br>***      | 0.067<br>*        | 0.067<br>*        | 0.041             | 0.025            | 0.020             | 0.040             | -<br>0.005        | 0.027             | -<br>0.001        | -<br>0.104<br>*** | -<br>0.042        | 0.026           | -<br>0.076<br>**  | 0.074<br>**       | 0.062<br>*        | -<br>0.031        | 0.108<br>***      | 0.177<br>***      | 0.064<br>*        | -            |              |              |   |
| V) Fruits           | 0.118<br>***      | 0.081<br>**       | 0.054             | 0.055<br>*        | 0.039            | 0.038             | 0.105<br>***      | 0.043             | 0.087<br>**       | 0.064<br>*        | -<br>0.062<br>*   | -<br>0.061<br>*   | -<br>0.058<br>* | -<br>0.044        | -<br>0.115<br>*** | -<br>0.011        | -<br>0.049        | -<br>0.059<br>*   | -<br>0.162<br>*** | -<br>0.033        | 0.221<br>*** | -            |              |   |
| W) Vegetable        | 0.170<br>***      | 0.110<br>***      | 0.112<br>***      | 0.052             | 0.055<br>*       | 0.058<br>*        | 0.084<br>**       | 0.055<br>*        | 0.045             | 0.066<br>*        | -<br>0.116<br>*** | -<br>0.066<br>*   | -<br>0.018      | -<br>0.063<br>*   | -<br>0.067<br>*   | -<br>0.018        | -<br>0.095<br>*** | -<br>0.145<br>*** | -<br>0.148<br>*** | -<br>0.117<br>*** | 0.177<br>*** | 0.346<br>*** | -            |   |
| X) Fish             | 0.081<br>**       | 0.035             | 0.066<br>*        | 0.079<br>**       | -<br>0.036       | 0.012             | 0.016             | -<br>0.008        | -<br>0.016        | 0.032             | -<br>0.137<br>*** | -<br>0.026        | -<br>0.024      | -<br>0.043        | -<br>0.067<br>*   | -<br>0.043        | -<br>0.056<br>*   | -<br>0.140<br>*** | -<br>0.118<br>*** | -<br>0.097<br>*** | 0.235<br>*** | 0.113<br>*** | 0.124<br>*** | - |

Table S1. Correlation Matrix between indicators of cognitive and academic achievement and KIDMED indicators. Pearson's correlation coefficient \*<0.05, \*\*<0.01, \*\*\*<0.001.

|                 |          | WD vs. LFV-HSD |        |        | WD vs. LFV-LSD |        |        | WD vs. MD |         |        | LFV-HSD vs LFV-LSD |        |        | LFV-HSD vs MD |        |        | LFV-LSD vs MD |        |        |
|-----------------|----------|----------------|--------|--------|----------------|--------|--------|-----------|---------|--------|--------------------|--------|--------|---------------|--------|--------|---------------|--------|--------|
|                 | Analysis | Diff.          | t      | p Bonf | Diff           | t      | p Bonf | Diff      | t       | p Bonf | Diff.              | t      | p Bonf | Diff          | t      | p Bonf | Diff          | t      | p Bonf |
| Fluid Reasoning | MM       | -0.2885        | -2.050 | 0.243  | -0.2672        | -1.924 | 0.328  | -0.4063   | -2.838  | 0.028  | 0.0212             | 0.317  | 1.000  | -0.1178       | -1.566 | 0.705  | -0.1391       | -2.007 | 0.270  |
|                 | ANC 1    | -0.2731        | -1.043 | 0.314  | -0.2424        | -1.752 | 0.480  | -0.3912   | -2.7306 | 0.038  | 0.0307             | 0.460  | 1.000  | -0.1182       | -1.574 | 0.694  | -0.1488       | -2.159 | 0.186  |
|                 | ANC 2    | -0.29991       | -2.136 | 0.197  | -0.29237       | -2.134 | 0.198  | -0.43046  | -3.099  | 0.012  | -0.00753           | 0.114  | 1.000  | -0.13955      | -1.869 | 0.371  | -0.14708      | -2.129 | 0.201  |
| SG Language     | MM       | -0.1833        | -1.672 | 0.568  | -0.3302        | -3.042 | 0.014  | -0.3840   | -3.439  | 0.004  | -0.1469            | -2.813 | 0.030  | -0.2007       | -3.425 | 0.004  | -0.0538       | -0.996 | 1.000  |
|                 | ANC 1    | -0.1868        | -1.708 | 0.528  | -0.3346        | -3.107 | 0.012  | -0.3831   | -3.443  | 0.004  | -0.1477            | -2.842 | 0.027  | -0.1963       | -3.361 | 0.005  | -0.0486       | -0.905 | 1.000  |
|                 | ANC 2    | -0.1910        | -1.752 | 0.480  | -0.3424        | -3.218 | 0.008  | -0.3907   | -3.547  | 0.002  | -0.1514            | -2.945 | 0.020  | -0.1997       | -3.444 | 0.004  | -0.0483       | -0.900 | 1.000  |
| SG Mathematics  | MM       | -0.1325        | -0.984 | 1.000  | -0.3001        | -2.242 | 0.151  | -0.3582   | -2.611  | 0.055  | -0.1676            | -2.608 | 0.056  | -0.2256       | -3.143 | 0.010  | -0.0581       | -0.875 | 1.000  |
|                 | ANC 1    | -0.1209        | -0.903 | 1.000  | -0.2786        | -2.114 | 0.208  | -0.3379   | -2.481  | 0.079  | -0.1577            | -2.481 | 0.079  | -0.2170       | -3.036 | 0.015  | -0.0593       | -0.903 | 1.000  |
|                 | ANC 2    | -0.1327        | -0.995 | 1.000  | -0.3007        | -2.308 | 0.127  | -0.3591   | -2.664  | 0.047  | -0.1679            | -2.669 | 0.046  | -0.2264       | 3.190  | 0.009  | -0.0585       | -0.891 | 1.000  |
| SG History      | MM       | -0.0472        | -0.426 | 1.000  | -0.2259        | -2.060 | 0.237  | -0.2995   | -2.651  | 0.049  | -0.1786            | -3.383 | 0.004  | -0.2522       | -4.251 | <.001  | -0.0736       | -1.347 | 0.884  |
|                 | ANC 1    | -0.0443        | -0.400 | 1.000  | -0.2190        | -2.009 | 0.268  | -0.2895   | -2.570  | 0.062  | -0.1747            | -3.321 | 0.006  | -0.2451       | -4.145 | <.001  | -0.0704       | -1.296 | 1.000  |
|                 | ANC 2    | -0.0680        | -0.615 | 1.000  | -0.2632        | -2.437 | 0.090  | -0.3321   | -2.970  | 0.018  | -0.1951            | -3.741 | 0.001  | -0.2640       | -4.486 | <.001  | -0.0689       | -1.265 | 1.000  |
| PISA            | MM       | -0.1905        | -1.79  | 0.438  | -0.3230        | -3.06  | 0.013  | -0.3914   | -3.62   | 0.002  | -0.1325            | -2.62  | 0.054  | -0.2009       | -3.55  | 0.002  | -0.0684       | -1.31  | 1.000  |
|                 | ANC 1    | -0.1826        | -1.73  | 0.504  | -0.3089        | -2.97  | 0.018  | -0.3790   | -3.53   | 0.003  | -0.1263            | -2.52  | 0.072  | -0.1963       | -3.48  | 0.002  | -0.0701       | -1.35  | 1.000  |
|                 | ANC 2    | -0.1904        | -1.81  | 0.425  | -0.3233        | -3.15  | 0.010  | -0.3929   | -3.69   | 0.001  | -0.1329            | -2.68  | 0.045  | -0.2025       | -3.62  | 0.002  | -0.0696       | -1.34  | 1.000  |

**Table S2.** Sensitivity analysis with and without cluster. MM: Mixed Model. ANC 1: ANCOVA Analysis with “school type”. ANC 2: ANCOVA Analysis without “school type”

**Table S3** shows the result of the latent class analysis with the number of participants for each item composing the clusters. These groups' differences are characterized by specific components which are represented by a unique profile found in the analysis.

|                  | WD (1)          |             | LFV-HSD (2)     |             | LFV-LSD (3)     |             | MED-DIET (4)    |             |
|------------------|-----------------|-------------|-----------------|-------------|-----------------|-------------|-----------------|-------------|
| Indicator        | non-meet / meet | Group comp. |
| Fish             | 52/4            | 2,3,4       | 127/238         | 1,4         | 168/379         | 1,4         | 55/273          | 1,2,3       |
| Second vegetable | 55/1            | 2,3,4       | 283/82          | 1,3,4       | 377/170         | 1,2,4       | 7/321           | 1,2,3       |
| Second fruit     | 55/1            | 2,3,4       | 242/123         | 1,3,4       | 466/81          | 1,2,4       | 10/318          | 1,2,3       |
| Nuts             | 56/0            | 2,3,4       | 160/205         | 1,4         | 253/294         | 1,4         | 59/269          | 1,2,3       |
| Junk Food        | 3/53            | 2,3,4       | 229/136         | 1,3,4       | 482/65          | 1,2         | 278/50          | 1,2         |
| Pasta            | 0/56            | 2,3,4       | 73/292          | 1,3         | 225/322         | 1,2,4       | 94/234          | 1,3         |
| Skip breakfast   | 14/42           | 2,3,4       | 250/115         | 1,3         | 492/55          | 1,2,4       | 240/88          | 1,3         |
| Pastry breakfast | 2/54            | 2,3,4       | 189/176         | 1,3,4       | 536/11          | 1,2,4       | 301/27          | 1,2,3       |
| Sweet            | 6/50            | 2,3,4       | 120/245         | 1,3,4       | 547/0           | 1,2,4       | 265/63          | 1,2,3       |

Clusters composition.

\*The number on the left side corresponds to the participants who do not meet the criteria evaluated as an indicator, while the number on the right side represents the participants who do respond to the criteria evaluated. 1: Western diet; 2: Low-fruit and vegetable and high-sugar diet; 3: Low-fruit and vegetable, low-sugar diet; 4: Mediterranean diet. Non-meet/meet the dietary indicator. Group comp: comparison between groups representing significant difference among them ( $p < 0.05$ )

|                       |          |         |        | 95% Confidence interval |         |             |          |          |
|-----------------------|----------|---------|--------|-------------------------|---------|-------------|----------|----------|
| Domain                | Status   | Mean    | SE     | Lower                   | Upper   | Comparisons |          | P-values |
| Total Cognitive       | WD       | 94.6    | 1.82   | 89.8                    | 99.3    | WD          | LFV-HSD  | 0.015    |
|                       | LFV-HSD  | 98.1    | 1.51   | 92.3                    | 104.0   | WD          | LFV-LSD  | <.001    |
|                       | LFV-NSD  | 101.2   | 1.49   | 95.1                    | 107.2   | WD          | MED-DIET | <.001    |
|                       | MED-DIET | 102.2   | 1.51   | 96.4                    | 108.0   | LFV-HSD     | LFV-LSD  | <.001    |
|                       | -        | -       | -      | -                       | -       | LFV-HSD     | MED-DIET | <.001    |
|                       | -        | -       | -      | -                       | -       | LFV-LSD     | MED-DIET | 0.374    |
| Cognitive Flexibility | WD       | -0.4099 | 0.1522 | -0.724                  | -0.0961 | WD          | LFV-HSD  | 0.317    |
|                       | LFV-HSD  | -0.1359 | 0.0913 | -0.415                  | 0.1427  | WD          | LFV-LSD  | 0.002    |
|                       | LFV-NSD  | 0.0865  | 0.0862 | -0.215                  | 0.3877  | WD          | MED-DIET | 0.001    |
|                       | MED-DIET | 0.1230  | 0.0927 | -0.151                  | 0.3970  | LFV-HSD     | LFV-LSD  | 0.006    |
|                       | -        | -       | -      | -                       | -       | LFV-HSD     | MED-DIET | 0.004    |
|                       | -        | -       | -      | -                       | -       | LFV-LSD     | MED-DIET | 1.000    |
| Inhibitory Control    | WD       | -0.2263 | 0.193  | -0.693                  | 0.241   | WD          | LFV-HSD  | 1.000    |
|                       | LFV-HSD  | -0.1095 | 0.151  | -0.675                  | 0.456   | WD          | LFV-LSD  | 0.077    |
|                       | LFV-NSD  | 0.1158  | 0.148  | -0.477                  | 0.708   | WD          | MED-DIET | 0.142    |
|                       | MED-DIET | 0.0942  | 0.151  | -0.465                  | 0.654   | LFV-HSD     | LFV-LSD  | 0.004    |
|                       | -        | -       | -      | -                       | -       | LFV-HSD     | MED-DIET | 0.037    |
|                       | -        | -       | -      | -                       | -       | LFV-LSD     | MED-DIET | 1.000    |
| Working Memory        | WD       | -0.3115 | 0.1511 | -0.6218                 | 0.00114 | WD          | LFV-HSD  | 1.000    |
|                       | LFV-HSD  | -0.1565 | 0.0901 | -0.4238                 | 0.11070 | WD          | LFV-LSD  | 0.066    |
|                       | LFV-NSD  | 0.0426  | 0.0849 | -0.2442                 | 0.32933 | WD          | MED-DIET | 0.005    |
|                       | MED-DIET | 0.1687  | 0.0915 | -0.0946                 | 0.43194 | LFV-HSD     | LFV-LSD  | 0.018    |
|                       | -        | -       | -      | -                       | -       | LFV-HSD     | MED-DIET | <.001    |
|                       | -        | -       | -      | -                       | -       | LFV-LSD     | MED-DIET | 0.417    |

|                 |          |          |        |         |         |         |          |       |
|-----------------|----------|----------|--------|---------|---------|---------|----------|-------|
| Fluid Reasoning | WD       | -0.28438 | 0.1431 | -0.5725 | 0.00371 | WD      | LFV-HSD  | 0.243 |
|                 | LFV-HSD  | -0.00410 | 0.0765 | -0.2086 | 0.21677 | WD      | LFV-LSD  | 0.328 |
|                 | LFV-NSD  | -0.01715 | 0.0704 | -0.2465 | 0.21225 | WD      | MED-DIET | 0.028 |
|                 | MED-DIET | 0.12191  | 0.0782 | -0.0875 | 0.33141 | LFV-HSD | LFV-LSD  | 1.000 |
|                 | -        | -        | -      | -       | -       | LFV-HSD | MED-DIET | 0.705 |
|                 | -        | -        | -      | -       | -       | LFV-LSD | MED-DIET | 0.270 |

Table S4. Post Hoc results of mixed model in comparisons of Mediterranean-style based dietary patterns and cognitive domains.

|                |          |      |        | 95% Confidence interval |       |             |          |                 |
|----------------|----------|------|--------|-------------------------|-------|-------------|----------|-----------------|
| School Subject | Status   | Mean | SE     | Lower                   | Upper | Comparisons |          | <i>P-values</i> |
| Language       | WD       | 5.11 | 0.1043 | 4.90                    | 5.32  | WD          | LFV-HSD  | 0.568           |
|                | LFV-HSD  | 5.29 | 0.0457 | 5.19                    | 5.40  | WD          | LFV-LSD  | 0.014           |
|                | LFV-NSD  | 5.44 | 0.0394 | 5.34                    | 5.54  | WD          | MED-DIET | 0.004           |
|                | MED-DIET | 5.49 | 0.0476 | 5.39                    | 5.60  | LFV-HSD     | LFV-LSD  | 0.030           |
|                | -        | -    | -      | -                       | -     | LFV-HSD     | MED-DIET | 0.004           |
|                | -        | -    | -      | -                       | -     | LFV-LSD     | MED-DIET | 1.000           |
| English        | WD       | 5.13 | 0.186  | 4.65                    | 5.61  | WD          | LFV-HSD  | 0.009           |
|                | LFV-HSD  | 5.52 | 0.153  | 4.94                    | 6.10  | WD          | LFV-LSD  | <.001           |
|                | LFV-NSD  | 5.72 | 0.150  | 5.12                    | 6.33  | WD          | MED-DIET | <.001           |
|                | MED-DIET | 5.73 | 0.153  | 5.16                    | 6.31  | LFV-HSD     | LFV-LSD  | 0.003           |
|                | -        | -    | -      | -                       | -     | LFV-HSD     | MED-DIET | 0.006           |
|                | -        | -    | -      | -                       | -     | LFV-LSD     | MED-DIET | 1.000           |
| Mathematics    | WD       | 5.10 | 0.1245 | 4.85                    | 5.34  | WD          | LFV-HSD  | 1.000           |
|                | LFV-HSD  | 5.23 | 0.0492 | 5.12                    | 5.34  | WD          | LFV-LSD  | 0.151           |
|                | LFV-NSD  | 5.40 | 0.0406 | 5.30                    | 5.50  | WD          | MED-DIET | 0.055           |
|                | MED-DIET | 5.46 | 0.0522 | 5.35                    | 5.57  | LFV-HSD     | LFV-LSD  | 0.056           |
|                | -        | -    | -      | -                       | -     | LFV-HSD     | MED-DIET | 0.010           |
|                | -        | -    | -      | -                       | -     | LFV-LSD     | MED-DIET | 1.000           |
| Science        | WD       | 5.13 | 0.1267 | 4.87                    | 5.39  | WD          | LFV-HSD  | 0.142           |
|                | LFV-HSD  | 5.39 | 0.0778 | 5.16                    | 5.63  | WD          | LFV-LSD  | 0.016           |
|                | LFV-NSD  | 5.47 | 0.0737 | 5.22                    | 5.73  | WD          | MED-DIET | 0.001           |
|                | MED-DIET | 5.57 | 0.0789 | 5.33                    | 5.80  | LFV-HSD     | LFV-LSD  | 0.846           |
|                | -        | -    | -      | -                       | -     | LFV-HSD     | MED-DIET | 0.033           |
|                | -        | -    | -      | -                       | -     | LFV-LSD     | MED-DIET | 0.665           |
| History        | WD       | 5.27 | 0.1105 | 5.05                    | 5.49  | WD          | LFV-HSD  | 1.000           |
|                | LFV-HSD  | 5.31 | 0.0559 | 5.17                    | 5.46  | WD          | LFV-LSD  | 0.237           |
|                | LFV-NSD  | 5.49 | 0.0507 | 5.34                    | 5.64  | WD          | MED-DIET | 0.049           |
|                | MED-DIET | 5.57 | 0.0574 | 5.42                    | 5.71  | LFV-HSD     | LFV-LSD  | 0.004           |
|                | -        | -    | -      | -                       | -     | LFV-HSD     | MED-DIET | <.001           |
|                | -        | -    | -      | -                       | -     | LFV-LSD     | MED-DIET | 1.000           |
| PISA           | WD       | 5.11 | 0.0987 | 4.92                    | 5.31  | WD          | LFV-HSD  | 0.438           |
|                | LFV-HSD  | 5.30 | 0.0398 | 5.22                    | 5.39  | WD          | LFV-LSD  | 0.013           |
|                | LFV-NSD  | 5.43 | 0.0331 | 5.35                    | 5.52  | WD          | MED-DIET | 0.002           |
|                | MED-DIET | 5.50 | 0.0420 | 5.41                    | 5.59  | LFV-HSD     | LFV-LSD  | 0.054           |
|                | -        | -    | -      | -                       | -     | LFV-HSD     | MED-DIET | 0.002           |
|                | -        | -    | -      | -                       | -     | LFV-LSD     | MED-DIET | 1.000           |

Table S5. Post Hoc results of mixed model in comparisons of Mediterranean-style based dietary patterns and academic subjects
